# Supplementary material
Source: PubMed Central journal article supplement (PMC6061782)
Supplement: ddy186_supplemental_table_1.pdf [file ddy186_supplemental_table_1.pdf]

Supplemental Table 1. A selection of recent iPSC-based drug screens (2016-2018)

| <b>Genetic disease</b>                  | <b>Screened mutant gene(s)</b>         | <b>iPSC-derived cell type for screen</b><br>( <i>in vitro</i> phenotype)                                                                          | <b>Screen type</b><br>(compounds tested)                                                                       | <b>Compound modulator(s)</b><br>(disease effect or readout)                                                                                                                       | <b><i>In vivo</i> disease model</b><br>(effect)    | <b>Ref.</b> |
|-----------------------------------------|----------------------------------------|---------------------------------------------------------------------------------------------------------------------------------------------------|----------------------------------------------------------------------------------------------------------------|-----------------------------------------------------------------------------------------------------------------------------------------------------------------------------------|----------------------------------------------------|-------------|
| <b>Age-related macular degeneration</b> | <b><i>ARMS2</i> &amp; <i>HTRA1</i></b> | <b>Retinal pigment epithelium</b><br>(↑ disease markers)                                                                                          | <b>Targeted testing</b><br>(1 - anti-inflammatory & anti-oxidant)                                              | <b>Nicotinamide</b><br>(↓ disease markers, pro-inflammatory cytokines, & complement factors, and ↑ SIRT1 & NAD biosynthetic pathway)                                              | <b>Not tested</b>                                  | (1)         |
| <b>Amyotrophic lateral sclerosis</b>    | <b><i>C9ORF72</i></b>                  | <b>Neurons</b><br>(↑ intracellular and extracellular poly(GP) protein)                                                                            | <b>Targeted testing</b><br>(1 - antisense oligonucleotide)                                                     | <b><i>Antisense oligonucleotide targeting G4C2 repeat C9ORF72 transcript</i></b> (↓ intracellular and extracellular poly(GP) protein)                                             | <b>Mouse</b><br>(↓ CSF and brain poly(GP) protein) | (2)         |
|                                         | <b><i>C9ORF72</i></b>                  | <b>Motor neurons</b><br>(cell death)                                                                                                              | <b>Post-screen validation</b><br>(1 – screening hit)                                                           | <b>Vardenafil</b><br>(↑ motor neuron survival)                                                                                                                                    | <b>Mouse</b><br>(↑ survival)                       | (3)         |
|                                         | <b><i>C9ORF72</i></b>                  | <b>Cortical &amp; motor neurons</b><br>(RNA repeat foci & dipeptide repeat proteins)                                                              | <b>Post-screen validation</b><br>(3 – screening hits)                                                          | <b>DB1246</b><br><b>DB1247</b><br><b>DB1273</b><br>(↓ RNA foci & repeat proteins)                                                                                                 | <b><i>Drosophila</i></b><br>(↑ survival)           | (4)         |
|                                         | <b><i>FUS</i></b>                      | <b>iPSCs with <i>FUS</i>-eGFP reporter</b><br>(↑ stress granule area with sodium arsenite or heat treatment, mislocalization of <i>FUS</i> -eGFP) | <b>Large collection</b><br>1 <sup>st</sup> : (1000 - chemical genetics)<br>2 <sup>nd</sup> : (1600 - unbiased) | <b>Rapamycin</b><br><b>Torkinib</b><br><b>Paroxetine</b><br><b>Promethazine</b><br><b>Trimipramine</b><br>(↓ <i>FUS</i> -eGFP stress granule area with sodium arsenite treatment) | <b>Not tested</b>                                  | (5)         |
|                                         | <b><i>SOD1</i></b>                     | <b>Motor neurons</b><br>(cell death)                                                                                                              | <b>Large collection</b><br>(1416 - unbiased)                                                                   | <b>Bosutinib</b><br>(↑ motor neuron survival)                                                                                                                                     | <b>Mouse</b><br>(↑ survival)                       | (6)         |

|                                                         |               |                                                                                                                                                     |                                                                                           |                                                                                                                                         |                                                                           |      |
|---------------------------------------------------------|---------------|-----------------------------------------------------------------------------------------------------------------------------------------------------|-------------------------------------------------------------------------------------------|-----------------------------------------------------------------------------------------------------------------------------------------|---------------------------------------------------------------------------|------|
|                                                         | <b>SOD1</b>   | <b>Spinal motor neurons</b><br>(cell death, ↑ markers of ER stress,                                                                                 | <b>Targeted testing</b><br>(6 - inhibitors of p38, ERK, JNK, or CDK kinases, p53, or WNT) | <b>FR180204</b><br><b>Pifithrin-α hydrobromide</b><br><b>SB203580</b><br><b>SP600125</b><br><b>XAV 939</b><br>(↑ motor neuron survival) | <b>Not tested</b>                                                         | (7)  |
| <b>Arterial calcification due to deficiency of CD73</b> | <b>NT5E</b>   | <b>Mesenchymal stromal cells</b><br>(↑ calcification, ↑ TNAP activity, ↓ adenosine production, ↓ PPI)                                               | <b>Targeted testing</b><br>(1 – A2bAR agonist & 1 - bisphosphonate)                       | <b>BAY 60-6583*</b><br><b>Etidronate</b><br>(↓ calcification, *↓ TNAP activity, & *↓ AKT and p70S6K phosphorylation)                    | <b>Mouse with patient iPSC-derived teratomas</b><br>(↓ calcification)     | (8)  |
| <b>Autism spectrum disorder</b>                         | <b>SHANK3</b> | <b>Neurons</b><br>(↓ Neurite length, neurite branch points, SHANK3 synaptic content, & frequency and intensity of spontaneous calcium oscillations) | <b>Post-screen validation</b><br>(2 – screening hits)                                     | <b>Lithium</b><br><b>Valproic acid</b><br>(↑ SHANK3 synaptic content & frequency and intensity of spontaneous calcium oscillations)     | <b>Human patients</b><br>(↓ autism severity, <i>only lithium tested</i> ) | (9)  |
| <b>Alzheimer's disease</b>                              | <b>APOE</b>   | <b>Neurons</b><br>(↑ amyloid beta [40 & 42], ↑ P-tau, ↓ GABAergic neurons, & ↑ ApoE4 fragments)                                                     | <b>Targeted testing</b><br>(1 – structure corrector)                                      | <b>PH002</b><br>(↓ amyloid beta [40 & 42], ↓ P-tau, ↑ GABAergic neurons, & ↓ ApoE4 fragments)                                           | <b>Not tested</b>                                                         | (10) |
|                                                         | <b>APP</b>    | <b>Neurons</b><br>(↑ amyloid beta 1-40 peptides)                                                                                                    | <b>Targeted testing</b><br>(2 - retromer stabilizers)                                     | <b>R33</b><br><b>R55</b><br>(↓ amyloid beta peptides & ↓ tau phosphorylation [+/- APP expression])                                      | <b>Not tested</b>                                                         | (11) |
|                                                         | <b>PSEN1</b>  | <b>Cortical neurons</b><br>(↑ amyloid beta 42/40 ratio)                                                                                             | <b>Large collection</b><br>(1258 - unbiased)                                              | <b>Bromocriptine</b><br><b>Cromolyn</b><br><b>Topiramate</b><br>(↓ amyloid beta 42)                                                     | <b>Not tested</b>                                                         | (12) |
|                                                         | <b>PSEN1</b>  | <b>Neurons</b><br>(↑ intra- & extracellular amyloid beta 42)                                                                                        | <b>Targeted testing</b><br>(1 - flavonoid)                                                | <b>Nobiletin</b><br>(↑ neprilysin mRNA, ↓ intra- & extracellular amyloid beta 42)                                                       | <b>Not tested</b>                                                         | (13) |

|                                                              |                                           |                                                                                                                                                                          |                                                                                                                                   |                                                                                                                           |                                                                                              |      |
|--------------------------------------------------------------|-------------------------------------------|--------------------------------------------------------------------------------------------------------------------------------------------------------------------------|-----------------------------------------------------------------------------------------------------------------------------------|---------------------------------------------------------------------------------------------------------------------------|----------------------------------------------------------------------------------------------|------|
|                                                              | <b>Trisomy 21</b>                         | <b>Cortical neurons</b><br>(Elevated amyloid beta 42/40 & 42/38 ratio)                                                                                                   | <b>Large collection</b><br>(1280 - unbiased)                                                                                      | <b>Selamectin</b><br>(↓ amyloid beta 42/38 ratio)                                                                         | <b>Not tested</b>                                                                            | (14) |
| <b>Behçet's disease</b>                                      | <b>Idiopathic</b>                         | <b>Hematopoietic precursor cells</b><br>( <i>AGTR2</i> , <i>CA9</i> , <i>CD44</i> , <i>CXCL1</i> , <i>HTN3</i> , <i>IL-2</i> , <i>PTGER4</i> , & <i>TSLP</i> expression) | <b>Targeted testing</b><br>(34 - immuno-suppressant and anti-inflammatory drugs)                                                  | <b>Multiple corticosteroids</b><br>(↓ <i>CXCL1</i> )                                                                      | <b>Not tested</b>                                                                            | (15) |
| <b>BH4 metabolism disorders</b>                              | <b><i>PTPS</i></b>                        | <b>Dopaminergic neurons</b><br>(↓ tyrosine hydroxylase, ↓ BH4, ↓ neurons, ↓ tyrosine hydroxylase area, ↓ extracellular dopamine, & ↑ neopterin)                          | <b>Targeted testing</b><br>(2 – BH4 supplements)                                                                                  | <b>BH4 Sepiapterin</b><br>(↑ tyrosine hydroxylase area & ↑ extracellular dopamine [ <i>PTPS</i> mutants only])            | <b>Not tested</b>                                                                            | (16) |
| <b>Catecholaminergic polymorphic ventricular tachycardia</b> | <b><i>CASQ2</i></b>                       | <b>Cardiomyocytes</b><br>(Abnormal Ca <sup>2+</sup> cycling, isoproterenol-induced arrhythmia)                                                                           | <b>Targeted testing</b><br>(34 - immuno-suppressant and anti-inflammatory drugs)<br><i>Targeted testing: 6 (anti-arrhythmics)</i> | <b>JTV-519</b><br><b>Carvedilol</b><br><b>Flecainide</b><br><b>Riluzole</b><br>(↓ Ca <sup>2+</sup> cycling abnormalities) | <b>Human patients</b><br>(↓ ventricular tachy-cardia events, <i>only flecainide tested</i> ) | (17) |
|                                                              | <b><i>RYR2</i></b>                        | <b>Cardiomyocytes</b><br>(Isoproterenol-induced abnormal diastolic Ca <sup>2+</sup> increase, & ↑ delayed afterdepolarizations)                                          | <b>Targeted testing</b><br>(1 – stabilizer of the closed state of the ryanodine receptor 2)                                       | <b>S107</b><br>(↓ delayed afterdepolarizations)                                                                           | <b>Not tested</b>                                                                            | (18) |
| <b>Diamond-Blackfan anemia</b>                               | <b><i>RPS19</i></b><br><b><i>RPL5</i></b> | <b>Hematopoietic stem cells &amp; erythroid progenitors</b><br>(↓ Erythroid progenitors in vitro and in vivo [after transplantation])                                    | <b>Large collection</b><br>(1440 - unbiased)                                                                                      | <b>SMER28</b><br>(↑ erythroid progenitors through <i>ATG5</i> )                                                           | <b>Mouse</b><br>(↑ Hb)<br><b>Zebrafish</b><br>(↑ red blood cells)                            | (19) |

|                                              |              |                                                                                                                                                                               |                                                                                                                   |                                                                                      |                                                                                                                                                       |      |
|----------------------------------------------|--------------|-------------------------------------------------------------------------------------------------------------------------------------------------------------------------------|-------------------------------------------------------------------------------------------------------------------|--------------------------------------------------------------------------------------|-------------------------------------------------------------------------------------------------------------------------------------------------------|------|
| <b>Inherited erythromelalgia</b>             | <b>SCN9A</b> | <b>Sensory neurons</b><br>(↑ excitability)                                                                                                                                    | <b>Targeted testing</b><br>(2 - Nav1.7 inhibitors)                                                                | <b>PF-05089771</b><br>(↓ excitability)                                               | <b>Human patient</b><br>(↓ heat-induced pain)                                                                                                         | (20) |
| <b>Familial hypercholesteremia</b>           | <b>LDLR</b>  | <b>Hepatocyte-like cells</b><br>(↑ levels of apoB in culture media, inability to traffic exogenous LDL-cholesterol to endosomes, no ↑ LDL-cholesterol clearance with statins) | <b>Large collection</b><br>(2320 - unbiased)                                                                      | <b>Digoxin</b><br><b>Proscillaridin</b><br>(↓ ApoB)                                  | <b>Humanized mouse</b><br>(↓ Serum LDL-cholesterol & apoB)<br><br><b>Human patient medical records</b><br>(↓ LDL-cholesterol with cardiac glycosides) | (21) |
| <b>Fibrodysplasia ossificans progressiva</b> | <b>ACVR1</b> | <b>Mesenchymal stromal cells with luciferase reporter</b><br>(No wild-type comparisons)                                                                                       | <b>Large collection</b><br>(6809 - unbiased)                                                                      | <b>Rapamycin</b><br>(↓ activin-A-mediated chondrogenic induction)                    | <b>Mouse</b><br>(↓ heterotopic ossification)                                                                                                          | (22) |
|                                              | <b>ACVR1</b> | <b>Osteogenic cells</b><br>(No differences to wild-type)                                                                                                                      | <b>Targeted testing</b><br>(3 - AMPK activators)                                                                  | <b>A769962</b><br><b>AICAR</b><br><b>Metformin</b><br>(↓ osteogenic differentiation) | <b>Not tested</b>                                                                                                                                     | (23) |
| <b>Fragile X syndrome</b>                    | <b>FMR1</b>  | <b>Neural progenitor cells with FMR1-nano luciferase reporter</b><br>(↓ FMR1 expression)                                                                                      | <b>Large collection</b><br>1 <sup>st</sup> : (128 – epigenetic modulators)<br>2 <sup>nd</sup> : (1134 – unbiased) | <b>5-aza-dC</b><br><b>5-aza-C</b><br>(↑ FMR1 expression)                             | <b>Not tested</b>                                                                                                                                     | (24) |

|                                |                       |                                                                                                                                                                                                         |                                                       |                                                                                                              |                                          |      |
|--------------------------------|-----------------------|---------------------------------------------------------------------------------------------------------------------------------------------------------------------------------------------------------|-------------------------------------------------------|--------------------------------------------------------------------------------------------------------------|------------------------------------------|------|
| <b>Friedreich ataxia</b>       | <b><i>FXN</i></b>     | <b>Neurons</b><br>(↓ frataxin, ↓ Fe–S synthesis elements, ↑ oxidative stress, & ↑ neuronal death)                                                                                                       | <b>Targeted testing</b><br>(1 – HDAC inhibitor)       | <b>HDAC inhibitor 109</b><br>(↑ frataxin, ↑ Fe–S synthesis elements, ↓ oxidative stress, & ↓ neuronal death) | <b>Not tested</b>                        | (25) |
| <b>Frontotemporal dementia</b> | <b><i>C9ORF72</i></b> | <b>Cortical &amp; motor neurons</b><br>(RNA repeat foci & dipeptide repeat proteins)                                                                                                                    | <b>Post-screen validation</b><br>(3 – screening hits) | <b>DB1246</b><br><b>DB1247</b><br><b>DB1273</b><br>(↓ RNA foci & repeat proteins)                            | <b>Drosophila</b><br>(↑ survival)        | (4)  |
|                                | <b><i>GRN</i></b>     | <b>Cortical neurons</b><br>(↓ <i>GRN</i> expression, ↓ PGRN [intracellular & secreted])                                                                                                                 | <b>Targeted testing</b><br>(1 - HDAC inhibitor)       | <b>SAHA</b><br>(↑ <i>GRN</i> expression, ↑ PGRN [intracellular & secreted])                                  | <b>Not tested</b>                        | (26) |
|                                | <b><i>GRN</i></b>     | <b>Neurons</b><br>(↓ PGRN)                                                                                                                                                                              | <b>Post-screen validation</b><br>(1 – screening hit)  | <b>Trehalose</b><br>(↑ PGRN)                                                                                 | <b>Mouse</b><br>(↑ brain levels of PGRN) | (27) |
|                                | <b><i>MAPT</i></b>    | <b>Cortical neurons</b><br>(↑ tau, ↑ P-tau, ↑ P-tau in neuronal processes and cell bodies, ↑ mutant tau, ↓ tau solubility, ↑ markers of ER stress and autophagy, ↑ cell death in presence of stressors) | <b>Targeted testing</b><br>(1 - autophagy stimulator) | <b>Rapamycin</b><br>(↑ cell survival in presence of stressors)                                               | <b>Not tested</b>                        | (28) |
| <b>Gaucher disease</b>         | <b><i>GBA1</i></b>    | <b>Dopaminergic neurons</b><br>(↓ gluco-cerebrosidase activity, ↑ gluco-sylceramide, & ↑ gluco-sylsphingosine)                                                                                          | <b>Targeted testing</b><br>(1 - molecular chaperone)  | <b>NCGC607</b><br>(↑ gluco-cerebrosidase activity & ↓ α-synuclein [in parkinsonism cells])                   | <b>Not tested</b>                        | (29) |

|                                        |                              |                                                                                                                                                 |                                                                                     |                                                                                                                                              |                                                              |      |
|----------------------------------------|------------------------------|-------------------------------------------------------------------------------------------------------------------------------------------------|-------------------------------------------------------------------------------------|----------------------------------------------------------------------------------------------------------------------------------------------|--------------------------------------------------------------|------|
|                                        | <b>GBA1</b>                  | <b>Dopaminergic neurons</b><br>(↑ ubiquitinated protein species, oxidized α-synuclein, & total α-synuclein)                                     | <b>Targeted testing</b><br>(1 - lysosomal enzyme acid ceramidase inhibitor)         | <b>Carmofur</b><br>(↓ ubiquitinated protein species, & oxidized α-synuclein)                                                                 | <b>Not tested</b>                                            | (30) |
| <b>Huntington's disease</b>            | <b>HTT</b>                   | <b>Medium spiny-like neurons</b><br>(↑ cell death)                                                                                              | <b>Targeted testing</b><br>(1 – PPARgamma activator)                                | <b>Bexarotene</b><br>(↓ cell death)                                                                                                          | <b>Mouse</b><br>(↑ motor function, survival, & # of neurons) | (31) |
|                                        | <b>HTT</b>                   | <b>Neurons</b><br>(dysregulated transcriptional programs & epigenetic signatures involved in neuronal development)                              | <b>Targeted testing</b><br>(1 – neuronal differentiation inducer)                   | <b>Isoxazole-9</b><br>(↓ cell death, ↓ neurite length, & ↑ <i>NEUROD1</i> expression)                                                        | <b>Mouse</b><br>(cognitive impairment & synaptic pathology)  | (32) |
|                                        | <b>HTT</b>                   | <b>Brain microvascular endothelial cells</b><br>(↑ migration, abnormal blood-brain barrier function, & perturbed angiogenic & barrier pathways) | <b>Targeted testing</b><br>(1 – WNT inhibitor)                                      | <b>XAV939</b><br>(Rescued angiogenic deficits)                                                                                               | <b>Not tested</b>                                            | (33) |
| <b>Long QT syndrome type 1 &amp; 2</b> | <b>KCNQ1</b><br><b>KCNH2</b> | <b>Cardiomyocytes</b><br>(↑ QT interval)                                                                                                        | <b>Targeted testing</b><br>(1 - hERG allosteric modulators)                         | <b>LUF7346</b><br>(↓ QT interval)                                                                                                            | <b>Not tested</b>                                            | (34) |
| <b>Long QT syndrome type 3</b>         | <b>SCN5A</b>                 | <b>Cardiomyocytes</b><br>(pronounced cardiac late sodium current)                                                                               | <b>Targeted testing</b><br>(1 - selective inhibitor of cardiac late sodium current) | <b>GS967</b><br>(↓ cardiac late sodium current, altered cardiac late sodium current kinetics, ↓ action potential, & ↓ pro-arrhythmic events) | <b>Not tested</b>                                            | (35) |

|                                          |                        |                                                                                                                                                                                                              |                                                                              |                                                                                                                                                                    |                   |      |
|------------------------------------------|------------------------|--------------------------------------------------------------------------------------------------------------------------------------------------------------------------------------------------------------|------------------------------------------------------------------------------|--------------------------------------------------------------------------------------------------------------------------------------------------------------------|-------------------|------|
| <b>MECP2 duplication syndrome</b>        | <b>MECP2</b>           | <b>Cortical neurons</b><br>(↑ synaptogenesis, dendritic arborization, & synchronized burst events)                                                                                                           | <b>Targeted testing</b><br>(43 – epigenetic modulators)                      | <b>NCH-51 Scriptaid</b><br>(↓ synaptic protein PSD95)                                                                                                              | <b>Not tested</b> | (36) |
| <b>Mitochondrial disorders (various)</b> | <b>MT-ATP6</b>         | <b>Neural progenitor cells</b><br>(↓ ATP, mitochondrial hyperpolarization, & altered calcium homeostasis)                                                                                                    | <b>Large collection</b><br>(130 – unbiased)                                  | <b>Avanafil</b><br>(↓ mitochondrial membrane potential)                                                                                                            | <b>Not tested</b> | (37) |
| <b>Neuronal ceroid lipofuscinoses</b>    | <b>PPT1 &amp; TPP1</b> | <b>Neural stem cells</b><br>(↑ Lysosomal lipid accumulation, enlarged lysosomes, & subunit C of mitochondrial ATP synthase puncta)                                                                           | <b>Targeted testing</b><br>(2 - lysosomal content reducers)                  | <b>δ-tocopherol*</b><br><b>HPBCD</b><br>(↓ enlarged lysosomes, *lysosomal lipid accumulation, & *subunit C of mitochondrial ATP synthase puncta)                   | <b>Not tested</b> | (38) |
| <b>Neutropenia</b>                       | <b>ELANE</b>           | <b>Neutrophils</b><br>(↓ Neutrophils)                                                                                                                                                                        | <b>Targeted testing</b><br>(2 - neutrophil elastase inhibitors)              | <b>MK0339</b><br>(↑ Neutrophils)                                                                                                                                   | <b>Not tested</b> | (39) |
| <b>Parkinson's disease</b>               | <b>DJ-1</b>            | <b>Midbrain dopaminergic neurons</b><br>(↑ mitochondrial oxidant stress, oxidized dopamine, neuromelanin, & oxidized, insoluble α-synuclein, L-dopa-mediated ↑ oxidized dopamine, and lysosomal dysfunction) | <b>Targeted testing</b><br>(2 - Cav1 channel antagonists & 2 - antioxidants) | <b>FK506*</b><br><b>Isradipine</b><br><b>mito-TEMPO</b><br><b>N-acetylcysteine**</b><br>(↓ oxidized dopamine, *, **restored lysosomal function, & ↓ **α-synuclein) | <b>Not tested</b> | (40) |

|                                     |              |                                                                                                                                                    |                                                                          |                                                                                                                                             |                                                                                                                                                                                                            |      |
|-------------------------------------|--------------|----------------------------------------------------------------------------------------------------------------------------------------------------|--------------------------------------------------------------------------|---------------------------------------------------------------------------------------------------------------------------------------------|------------------------------------------------------------------------------------------------------------------------------------------------------------------------------------------------------------|------|
|                                     | <b>LRRK2</b> | <b>Dopaminergic neurons</b><br>(↑ p-APP & ↓ tyrosine hydroxylase)                                                                                  | <b>Targeted testing</b><br>(1 - LRRK2 catalytic inhibitor)               | <b>LRRK2-IN-1</b><br>(↓ p-APP & ↑ tyrosine hydroxylase)                                                                                     | <b>Mouse</b><br>(HG-10-102-01 treatment: ↓ p-APP, ↑ tyrosine hydroxylase)                                                                                                                                  | (41) |
|                                     | <b>SNCA</b>  | <b>Neurons</b><br>(αSyn aggregation, neurite dysmorphia, & synaptic defects)                                                                       | <b>Targeted testing</b><br>(3 - modulators of αSyn oligomers)            | <b>NPT100-18A*</b><br><b>NPT100-14A</b><br><b>ELN484228</b><br>(↓ axonal degeneration, protection from proteasome inhibition, *↑ neurite #) | <b>Not tested</b>                                                                                                                                                                                          | (42) |
|                                     | <b>SNCA</b>  | <b>Neural precursor cells &amp; neurons</b><br>(No iPSC-derived wild-type comparisons)                                                             | <b>Post-screen validation</b><br>(1 – screening hit)                     | <b>Clenbuterol</b><br>(↓ rotenone-induced superoxide [in neural precursors] & ↓ SNCA)                                                       | <b>Mouse, wild-type</b><br>(↓ SNCA in substantia nigra)<br><b>Patient medical records from Norwegian Prescription Database</b><br>(Parkinson's disease risk ↓ with β2AR agonists, ↑ with β2AR antagonists) | (43) |
| <b>Pelizaeus-Merzbacher disease</b> | <b>PLP1</b>  | <b>Oligodendrocytes</b> (↓ Process length, ↓ process number, PLP endoplasmic reticulum retention, differentiation defects, & myelination deficits) | <b>Targeted testing</b><br>(2 - endoplasmic reticulum stress modulators) | <b>Guanabenz</b><br><b>GSK2656157</b><br>(↑ PLP shuttling to processes & ↑ myelination)                                                     | <b>Not tested</b>                                                                                                                                                                                          | (44) |



|                                        |                     |                                                                                                                                                                                                                                                                                                              |                                                                       |                                                                                                                                          |                                                  |      |
|----------------------------------------|---------------------|--------------------------------------------------------------------------------------------------------------------------------------------------------------------------------------------------------------------------------------------------------------------------------------------------------------|-----------------------------------------------------------------------|------------------------------------------------------------------------------------------------------------------------------------------|--------------------------------------------------|------|
| <b>Pulmonary arterial hypertension</b> | <b><i>BMPR2</i></b> | <b>Endothelial cells</b><br>(angiogenesis and wound closure assay abnormalities, ↓ <i>BMPR2</i> , & ↓ <i>BMPR2</i> downstream pathway effectors [after stimulation])                                                                                                                                         | <b>Targeted testing</b><br>(2 - <i>BMPR2</i> signaling enhancers)     | <b>Elafin<br/>FK506</b><br>(Improved angiogenesis and wound closure assay performance [in responding lines])                             | <b>Not tested</b>                                | (45) |
| <b>Retinitis pigmentosa</b>            | <b><i>MERTK</i></b> | <b>Retinal pigment epithelium</b><br>(↓ phagocytosis, no <i>MERTK</i> staining)                                                                                                                                                                                                                              | <b>Targeted testing</b><br>(2 - translation read-through promoters)   | <b>G418</b><br>(Detection of <i>MERTK</i> )<br><b>PTC124</b><br>(↑ phagocytosis & detection of <i>MERTK</i> )                            | <b>Not tested</b>                                | (46) |
| <b>Short QT syndrome - type 1</b>      | <b><i>KCNH2</i></b> | <b>Cardiomyocytes</b> (↑ <i>KCNH2</i> , ↓ action potential duration, ↑ rapidly activating delayed rectifier potassium current, ↑ expression of <i>KCND3</i> , <i>KCHIP2</i> , <i>CACNA1C</i> , & <i>KCNH2</i> , ↑ intracellular $Ca^{2+}$ level, ↑ arrhythmic events, ↑ carbachol-induced arrhythmic events) | <b>Targeted testing</b><br>(3 - anti-arrhythmics)                     | <b>Quinidine</b><br>(↑ action potential duration & ↓ carbachol-induced arrhythmic events)                                                | <b>Not tested</b>                                | (47) |
| <b>Spinal muscular atrophy</b>         | <b><i>SMN1</i></b>  | <b>Neurons</b><br>(No assessment of phenotype in neurons but ↓ <i>SMN</i> in iPSCs)                                                                                                                                                                                                                          | <b>Targeted testing</b><br>(14 – tetrapeptide HDAC inhibitors)        | <b>Compound 3</b><br>(↑ <i>SMN2</i> expression)                                                                                          | <b>Not tested</b>                                | (48) |
|                                        | <b><i>SMN1</i></b>  | <b>Spinal motor neurons</b><br>(↓ dendrite length & branching, ↑ apoptosis, ↑ astrocytes)                                                                                                                                                                                                                    | <b>Targeted testing</b><br>(1 – thyrotropin-releasing hormone analog) | <b>5-oxo-l-prolyl-l-histidyl-l-prolinamide</b><br>(↑ <i>SMN2</i> expression, ↑ <i>SMN</i> , ↑ dendrite length & branching, & ↑ p-GSK-3β) | <b>Human patients</b><br>(improved gait metrics) | (49) |

|                                      |                |                                                                                                                                    |                                                                          |                                                                                                                                                               |                   |      |
|--------------------------------------|----------------|------------------------------------------------------------------------------------------------------------------------------------|--------------------------------------------------------------------------|---------------------------------------------------------------------------------------------------------------------------------------------------------------|-------------------|------|
| <b>Spinocerebellar ataxia type 6</b> | <b>CACNA1A</b> | <b>Purkinje cells</b><br>(↑ Cav2.1, ↓ Cav2.1 c-terminal domain [α1ACT], & ↓ cell survival and dendrite deficits [in T3 depletion]) | <b>Targeted testing</b><br>(5 – various mechanisms)                      | <b>Riluzole</b><br><b>Thyroid releasing hormone</b><br>(↑ cell survival & dendrite deficits [in T3 depletion])                                                | <b>Not tested</b> | (50) |
| <b>Timothy syndrome</b>              | <b>CACNA1C</b> | <b>Cardiomyocytes</b><br>(↓ spontaneous beating rate & ↑ contraction irregularity)                                                 | <b>Targeted testing</b><br>(20 – roscovitine analogs & 4 CDK inhibitors) | <b>CR8</b><br><b>DRF053</b><br><b>Myoseverin-B</b><br><b>PHA-793887</b><br>(↑ spontaneous beating rate & ↓ contraction irregularity, through CDK5 inhibition) | <b>Not tested</b> | (51) |
| <b>VCP-associated disease</b>        | <b>VCP</b>     | <b>Myogenic lineage cells</b><br>(↑ TDP-43, ubiquitin, Light Chain 3-I/II protein, & p62)                                          | <b>Targeted testing</b><br>(7 - autophagy stimulators or inhibitors)     | <b>AT101</b><br><b>Perifosine</b><br><b>Rapamycin</b><br>(↓ VCP pathological markers)                                                                         | <b>Not tested</b> | (52) |
| <b>Wolman disease</b>                | <b>LIPA</b>    | <b>Neural stem cells</b><br>(↓ lysosomal acid lipase activity, & ↑ lysosomal content and lipids)                                   | <b>Targeted testing</b><br>(2 - lysosomal content reducers)              | <b>δ-tocopherol</b><br><b>HPBCD</b><br>(↓ lysosomal content and lipids)                                                                                       | <b>Not tested</b> | (53) |

1 Saini, J.S., Corneo, B., Miller, J.D., Kiehl, T.R., Wang, Q., Boles, N.C., Blenkinsop, T.A., Stern, J.H. and Temple, S. (2017) Nicotinamide Ameliorates Disease Phenotypes in a Human iPSC Model of Age-Related Macular Degeneration. *Cell stem cell*, **20**, 635-647 e637.

2 Gendron, T.F., Chew, J., Stankowski, J.N., Hayes, L.R., Zhang, Y.J., Prudencio, M., Carlomagno, Y., Daugherty, L.M., Jansen-West, K., Perkerson, E.A. *et al.* (2017) Poly(GP) proteins are a useful pharmacodynamic marker for C9ORF72-associated amyotrophic lateral sclerosis. *Sci Transl Med*, **9**.

3 Osborn, T.M., Beagan, J. and Isacson, O. (2018) Increased motor neuron resilience by small molecule compounds that regulate IGF-II expression. *Neurobiology of disease*, **110**, 218-230.

- 4 Simone, R., Balendra, R., Moens, T.G., Preza, E., Wilson, K.M., Heslegrave, A., Woodling, N.S., Niccoli, T., Gilbert-Jaramillo, J., Abdelkarim, S. *et al.* (2018) G-quadruplex-binding small molecules ameliorate C9orf72 FTD/ALS pathology in vitro and in vivo. *EMBO Mol Med*, **10**, 22-31.
- 5 Marrone, L., Poser, I., Casci, I., Japtok, J., Reinhardt, P., Janosch, A., Andree, C., Lee, H.O., Moebius, C., Koerner, E. *et al.* (2018) Isogenic FUS-eGFP iPSC Reporter Lines Enable Quantification of FUS Stress Granule Pathology that Is Rescued by Drugs Inducing Autophagy. *Stem Cell Reports*, **10**, 375-389.
- 6 Imamura, K., Izumi, Y., Watanabe, A., Tsukita, K., Woltjen, K., Yamamoto, T., Hotta, A., Kondo, T., Kitaoka, S., Ohta, A. *et al.* (2017) The Src/c-Abl pathway is a potential therapeutic target in amyotrophic lateral sclerosis. *Sci Transl Med*, **9**.
- 7 Bhingre, A., Namboori, S.C., Zhang, X., VanDongen, A.M.J. and Stanton, L.W. (2017) Genetic Correction of SOD1 Mutant iPSCs Reveals ERK and JNK Activated AP1 as a Driver of Neurodegeneration in Amyotrophic Lateral Sclerosis. *Stem Cell Reports*, **8**, 856-869.
- 8 Jin, H., St Hilaire, C., Huang, Y., Yang, D., Dmitrieva, N.I., Negro, A., Schwartzbeck, R., Liu, Y., Yu, Z., Walts, A. *et al.* (2016) Increased activity of TNAP compensates for reduced adenosine production and promotes ectopic calcification in the genetic disease ACDC. *Sci Signal*, **9**, ra121.
- 9 Darville, H., Poulet, A., Rodet-Amsellem, F., Chatrousse, L., Pernelle, J., Boissart, C., Heron, D., Nava, C., Perrier, A., Jarrige, M. *et al.* (2016) Human Pluripotent Stem Cell-derived Cortical Neurons for High Throughput Medication Screening in Autism: A Proof of Concept Study in SHANK3 Haploinsufficiency Syndrome. *EBioMedicine*, **9**, 293-305.
- 10 Wang, C., Najm, R., Xu, Q., Jeong, D.E., Walker, D., Balestra, M.E., Yoon, S.Y., Yuan, H., Li, G., Miller, Z.A. *et al.* (2018) Gain of toxic apolipoprotein E4 effects in human iPSC-derived neurons is ameliorated by a small-molecule structure corrector. *Nature medicine*, in press.
- 11 Young, J.E., Fong, L.K., Frankowski, H., Petsko, G.A., Small, S.A. and Goldstein, L.S.B. (2018) Stabilizing the Retromer Complex in a Human Stem Cell Model of Alzheimer's Disease Reduces TAU Phosphorylation Independently of Amyloid Precursor Protein. *Stem Cell Reports*, **10**, 1046-1058.
- 12 Kondo, T., Imamura, K., Funayama, M., Tsukita, K., Miyake, M., Ohta, A., Woltjen, K., Nakagawa, M., Asada, T., Arai, T. *et al.* (2017) iPSC-Based Compound Screening and In Vitro Trials Identify a Synergistic Anti-amyloid beta Combination for Alzheimer's Disease. *Cell Rep*, **21**, 2304-2312.
- 13 Kimura, J., Shimizu, K., Kajima, K., Yokosuka, A., Mimaki, Y., Oku, N. and Ohizumi, Y. (2018) Nobiletin Reduces Intracellular and Extracellular beta-Amyloid in iPS Cell-Derived Alzheimer's Disease Model Neurons. *Biol Pharm Bull*, **41**, 451-457.
- 14 Brownjohn, P.W., Smith, J., Portelius, E., Serneels, L., Kvartsberg, H., De Strooper, B., Blennow, K., Zetterberg, H. and Livesey, F.J. (2017) Phenotypic Screening Identifies Modulators of Amyloid Precursor Protein Processing in Human Stem Cell Models of Alzheimer's Disease. *Stem Cell Reports*, **8**, 870-882.

- 15 Son, M.Y., Kim, Y.D., Seol, B., Lee, M.O., Na, H.J., Yoo, B., Chang, J.S. and Cho, Y.S. (2017) Biomarker Discovery by Modeling Behcet's Disease with Patient-Specific Human Induced Pluripotent Stem Cells. *Stem Cells Dev*, **26**, 133-145.
- 16 Ishikawa, T., Imamura, K., Kondo, T., Koshiba, Y., Hara, S., Ichinose, H., Furujo, M., Kinoshita, M., Oeda, T., Takahashi, J. *et al.* (2016) Genetic and pharmacological correction of aberrant dopamine synthesis using patient iPSCs with BH4 metabolism disorders. *Hum Mol Genet*, **25**, 5188-5197.
- 17 Maizels, L., Huber, I., Arbel, G., Tijssen, A.J., Gepstein, A., Khoury, A. and Gepstein, L. (2017) Patient-Specific Drug Screening Using a Human Induced Pluripotent Stem Cell Model of Catecholaminergic Polymorphic Ventricular Tachycardia Type 2. *Circ Arrhythm Electrophysiol*, **10**.
- 18 Sasaki, K., Makiyama, T., Yoshida, Y., Wuriyanghai, Y., Kamakura, T., Nishiuchi, S., Hayano, M., Harita, T., Yamamoto, Y., Kohjitani, H. *et al.* (2016) Patient-Specific Human Induced Pluripotent Stem Cell Model Assessed with Electrical Pacing Validates S107 as a Potential Therapeutic Agent for Catecholaminergic Polymorphic Ventricular Tachycardia. *PLoS One*, **11**, e0164795.
- 19 Doulatov, S., Vo, L.T., Macari, E.R., Wahlster, L., Kinney, M.A., Taylor, A.M., Barragan, J., Gupta, M., McGrath, K., Lee, H.Y. *et al.* (2017) Drug discovery for Diamond-Blackfan anemia using reprogrammed hematopoietic progenitors. *Sci Transl Med*, **9**.
- 20 Cao, L., McDonnell, A., Nitzsche, A., Alexandrou, A., Saintot, P.P., Loucif, A.J., Brown, A.R., Young, G., Mis, M., Randall, A. *et al.* (2016) Pharmacological reversal of a pain phenotype in iPSC-derived sensory neurons and patients with inherited erythromelalgia. *Sci Transl Med*, **8**, 335ra356.
- 21 Cayo, M.A., Mallanna, S.K., Di Furio, F., Jing, R., Tolliver, L.B., Bures, M., Urick, A., Noto, F.K., Pashos, E.E., Greseth, M.D. *et al.* (2017) A Drug Screen using Human iPSC-Derived Hepatocyte-like Cells Reveals Cardiac Glycosides as a Potential Treatment for Hypercholesterolemia. *Cell stem cell*, **20**, 478-489 e475.
- 22 Hino, K., Horigome, K., Nishio, M., Komura, S., Nagata, S., Zhao, C., Jin, Y., Kawakami, K., Yamada, Y., Ohta, A. *et al.* (2017) Activin-A enhances mTOR signaling to promote aberrant chondrogenesis in fibrodysplasia ossificans progressiva. *J Clin Invest*, **127**, 3339-3352.
- 23 Lin, H., Ying, Y., Wang, Y.Y., Wang, G., Jiang, S.S., Huang, D., Luo, L., Chen, Y.G., Gerstenfeld, L.C. and Luo, Z. (2017) AMPK downregulates ALK2 via increasing the interaction between Smurf1 and Smad6, leading to inhibition of osteogenic differentiation. *Biochim Biophys Acta*, **1864**, 2369-2377.
- 24 Li, M., Zhao, H., Ananiev, G.E., Musser, M.T., Ness, K.H., Maglaque, D.L., Saha, K., Bhattacharyya, A. and Zhao, X. (2017) Establishment of Reporter Lines for Detecting Fragile X Mental Retardation (FMR1) Gene Reactivation in Human Neural Cells. *Stem cells*, **35**, 158-169.
- 25 Codazzi, F., Hu, A., Rai, M., Donatello, S., Salerno Scarzella, F., Mangiameli, E., Pelizzoni, I., Grohovaz, F. and Pandolfo, M. (2016) Friedreich ataxia-induced pluripotent stem cell-derived neurons show a cellular phenotype that is corrected by a benzamide HDAC inhibitor. *Hum Mol Genet*, **25**, 4847-4855.

- 26 Almeida, S., Gao, F., Coppola, G. and Gao, F.B. (2016) Suberoylanilide hydroxamic acid increases progranulin production in iPSC-derived cortical neurons of frontotemporal dementia patients. *Neurobiol Aging*, **42**, 35-40.
- 27 Holler, C.J., Taylor, G., McEachin, Z.T., Deng, Q., Watkins, W.J., Hudson, K., Easley, C.A., Hu, W.T., Hales, C.M., Rossoll, W. *et al.* (2016) Trehalose upregulates progranulin expression in human and mouse models of GRN haploinsufficiency: a novel therapeutic lead to treat frontotemporal dementia. *Mol Neurodegener*, **11**, 46.
- 28 Silva, M.C., Cheng, C., Mair, W., Almeida, S., Fong, H., Biswas, M.H.U., Zhang, Z., Huang, Y., Temple, S., Coppola, G. *et al.* (2016) Human iPSC-Derived Neuronal Model of Tau-A152T Frontotemporal Dementia Reveals Tau-Mediated Mechanisms of Neuronal Vulnerability. *Stem Cell Reports*, **7**, 325-340.
- 29 Aflaki, E., Borger, D.K., Moaven, N., Stubblefield, B.K., Rogers, S.A., Patnaik, S., Schoenen, F.J., Westbroek, W., Zheng, W., Sullivan, P. *et al.* (2016) A New Glucocerebrosidase Chaperone Reduces alpha-Synuclein and Glycolipid Levels in iPSC-Derived Dopaminergic Neurons from Patients with Gaucher Disease and Parkinsonism. *The Journal of neuroscience : the official journal of the Society for Neuroscience*, **36**, 7441-7452.
- 30 Kim, M.J., Jeon, S., Burbulla, L.F. and Krainc, D. (2018) Acid ceramidase inhibition ameliorates alpha-synuclein accumulation upon loss of GBA1 function. *Hum Mol Genet*, in press.
- 31 Dickey, A.S., Sanchez, D.N., Arreola, M., Sampat, K.R., Fan, W., Arbez, N., Akimov, S., Van Kanegan, M.J., Ohnishi, K., Gilmore-Hall, S.K. *et al.* (2017) PPARdelta activation by bexarotene promotes neuroprotection by restoring bioenergetic and quality control homeostasis. *Sci Transl Med*, **9**.
- 32 Consortium, H.D.i. (2017) Developmental alterations in Huntington's disease neural cells and pharmacological rescue in cells and mice. *Nat Neurosci*, **20**, 648-660.
- 33 Lim, R.G., Quan, C., Reyes-Ortiz, A.M., Lutz, S.E., Kedaigle, A.J., Gipson, T.A., Wu, J., Vatine, G.D., Stocksdales, J., Casale, M.S. *et al.* (2017) Huntington's Disease iPSC-Derived Brain Microvascular Endothelial Cells Reveal WNT-Mediated Angiogenic and Blood-Brain Barrier Deficits. *Cell Rep*, **19**, 1365-1377.
- 34 Sala, L., Yu, Z., Ward-van Oostwaard, D., van Veldhoven, J.P., Moretti, A., Laugwitz, K.L., Mummery, C.L., AP, I.J. and Bellin, M. (2016) A new hERG allosteric modulator rescues genetic and drug-induced long-QT syndrome phenotypes in cardiomyocytes from isogenic pairs of patient induced pluripotent stem cells. *EMBO Mol Med*, **8**, 1065-1081.
- 35 Portero, V., Casini, S., Hoekstra, M., Verkerk, A.O., Mengarelli, I., Belardinelli, L., Rajamani, S., Wilde, A.A.M., Bezzina, C.R., Veldkamp, M.W. *et al.* (2017) Anti-arrhythmic potential of the late sodium current inhibitor GS-458967 in murine Scn5a-1798insD+/- and human SCN5A-1795insD+/- iPSC-derived cardiomyocytes. *Cardiovasc Res*, **113**, 829-838.
- 36 Nageshappa, S., Carromeu, C., Trujillo, C.A., Mesci, P., Espuny-Camacho, I., Pasciuto, E., Vanderhaeghen, P., Verfaillie, C.M., Raitano, S., Kumar, A. *et al.* (2016) Altered neuronal network and rescue in a human MECP2 duplication model. *Mol Psychiatry*, **21**, 178-188.

- 37 Lorenz, C., Lesimple, P., Bukowiecki, R., Zink, A., Inak, G., Mlody, B., Singh, M., Semtner, M., Mah, N., Aure, K. *et al.* (2017) Human iPSC-Derived Neural Progenitors Are an Effective Drug Discovery Model for Neurological mtDNA Disorders. *Cell stem cell*, **20**, 659-674 e659.
- 38 Sima, N., Li, R., Huang, W., Xu, M., Beers, J., Zou, J., Titus, S., Ottinger, E.A., Marugan, J.J., Xie, X. *et al.* (2018) Neural stem cells for disease modeling and evaluation of therapeutics for infantile (CLN1/PPT1) and late infantile (CLN2/TPP1) neuronal ceroid lipofuscinoses. *Orphanet J Rare Dis*, **13**, 54.
- 39 Makaryan, V., Kelley, M.L., Fletcher, B., Bolyard, A.A., Aprikyan, A.A. and Dale, D.C. (2017) Elastase inhibitors as potential therapies for ELANE-associated neutropenia. *J Leukoc Biol*, **102**, 1143-1151.
- 40 Burbulla, L.F., Song, P., Mazzulli, J.R., Zampese, E., Wong, Y.C., Jeon, S., Santos, D.P., Blanz, J., Obermaier, C.D., Strojny, C. *et al.* (2017) Dopamine oxidation mediates mitochondrial and lysosomal dysfunction in Parkinson's disease. *Science*, **357**, 1255-1261.
- 41 Chen, Z.C., Zhang, W., Chua, L.L., Chai, C., Li, R., Lin, L., Cao, Z., Angeles, D.C., Stanton, L.W., Peng, J.H. *et al.* (2017) Phosphorylation of amyloid precursor protein by mutant LRRK2 promotes AICD activity and neurotoxicity in Parkinson's disease. *Sci Signal*, **10**.
- 42 Kouroupi, G., Taoufik, E., Vlachos, I.S., Tsioras, K., Antoniou, N., Papastefanaki, F., Chroni-Tzartou, D., Wrasidlo, W., Bohl, D., Stellas, D. *et al.* (2017) Defective synaptic connectivity and axonal neuropathology in a human iPSC-based model of familial Parkinson's disease. *Proceedings of the National Academy of Sciences of the United States of America*, **114**, E3679-E3688.
- 43 Mittal, S., Bjornevik, K., Im, D.S., Flierl, A., Dong, X., Locascio, J.J., Abo, K.M., Long, E., Jin, M., Xu, B. *et al.* (2017) beta2-Adrenoreceptor is a regulator of the alpha-synuclein gene driving risk of Parkinson's disease. *Science*, **357**, 891-898.
- 44 Nevin, Z.S., Factor, D.C., Karl, R.T., Douvaras, P., Laukka, J., Windrem, M.S., Goldman, S.A., Fossati, V., Hobson, G.M. and Tesar, P.J. (2017) Modeling the Mutational and Phenotypic Landscapes of Pelizaeus-Merzbacher Disease with Human iPSC-Derived Oligodendrocytes. *Am J Hum Genet*, **100**, 617-634.
- 45 Sa, S., Gu, M., Chappell, J., Shao, N.Y., Ameen, M., Elliott, K.A., Li, D., Grubert, F., Li, C.G., Taylor, S. *et al.* (2017) Induced Pluripotent Stem Cell Model of Pulmonary Arterial Hypertension Reveals Novel Gene Expression and Patient Specificity. *Am J Respir Crit Care Med*, **195**, 930-941.
- 46 Ramsden, C.M., Nommiste, B., A, R.L., Carr, A.F., Powner, M.B., M, J.K.S., Chen, L.L., Muthiah, M.N., Webster, A.R., Moore, A.T. *et al.* (2017) Rescue of the MERTK phagocytic defect in a human iPSC disease model using translational read-through inducing drugs. *Sci Rep*, **7**, 51.
- 47 El-Battrawy, I., Lan, H., Cyganek, L., Zhao, Z., Li, X., Buljubasic, F., Lang, S., Yucel, G., Sattler, K., Zimmermann, W.H. *et al.* (2018) Modeling Short QT Syndrome Using Human-Induced Pluripotent Stem Cell-Derived Cardiomyocytes. *J Am Heart Assoc*, **7**.

- 48 Lai, J.I., Leman, L.J., Ku, S., Vickers, C.J., Olsen, C.A., Montero, A., Ghadiri, M.R. and Gottesfeld, J.M. (2017) Cyclic tetrapeptide HDAC inhibitors as potential therapeutics for spinal muscular atrophy: Screening with iPSC-derived neuronal cells. *Bioorg Med Chem Lett*, **27**, 3289-3293.
- 49 Ohuchi, K., Funato, M., Kato, Z., Seki, J., Kawase, C., Tamai, Y., Ono, Y., Nagahara, Y., Noda, Y., Kameyama, T. *et al.* (2016) Established Stem Cell Model of Spinal Muscular Atrophy Is Applicable in the Evaluation of the Efficacy of Thyrotropin-Releasing Hormone Analog. *Stem Cells Transl Med*, **5**, 152-163.
- 50 Ishida, Y., Kawakami, H., Kitajima, H., Nishiyama, A., Sasai, Y., Inoue, H. and Muguruma, K. (2016) Vulnerability of Purkinje Cells Generated from Spinocerebellar Ataxia Type 6 Patient-Derived iPSCs. *Cell Rep*, **17**, 1482-1490.
- 51 Song, L., Park, S.E., Isseroff, Y., Morikawa, K. and Yazawa, M. (2017) Inhibition of CDK5 Alleviates the Cardiac Phenotypes in Timothy Syndrome. *Stem Cell Reports*, **9**, 50-57.
- 52 Llewellyn, K.J., Nalbandian, A., Weiss, L.N., Chang, I., Yu, H., Khatib, B., Tan, B., Scarfone, V. and Kimonis, V.E. (2017) Myogenic differentiation of VCP disease-induced pluripotent stem cells: A novel platform for drug discovery. *PLoS One*, **12**, e0176919.
- 53 Aguisanda, F., Yeh, C.D., Chen, C.Z., Li, R., Beers, J., Zou, J., Thorne, N. and Zheng, W. (2017) Neural stem cells for disease modeling of Wolman disease and evaluation of therapeutics. *Orphanet J Rare Dis*, **12**, 120.
